# Supplementary material for: The Relationship between Pica and Iron Deficiency Anemia among Pregnant Women in East Jeddah Hospital
Source: Preprints.org preprint supplement (doi:10.20944/preprints202107.0166.v1), 2021-07-07
Supplement: Supplementary file 1 [file supplementary]

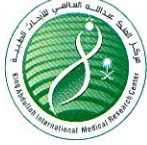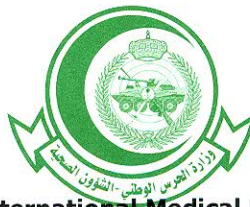

King Abdullah International Medical Research Center  
(KAIMRC)

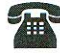

(84) 46669

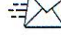

6464

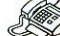

94466

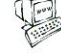

[irb@ngha.med.sa](mailto:irb@ngha.med.sa)

IRB NCBE Registration No.:  
H-01-R-005

**IRB Office**

Memo Ref.No. IRBC/0742/20

E-CTS Ref. No.

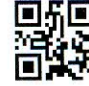

JED-20-427780-64660

Study Number: **SP20/127/J**  
Study Title: **The Relationship between Pica and Iron Deficiency Anemia among Pregnant Women in East Jeddah Hospital**  
Study Sponsor: **Non Grant**  
IRB Approval Date: **18 May 2020**  
IRB Review Type:  **Expedited Review**  **Full Board**  
Study site(s): **Western Region**

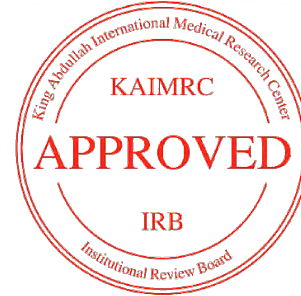

Dear **Dr. Howieda Ahmed Fouly**  
Assistant Professor, Maternity Nursing, College of Nursing, KSAU-HS, Jeddah  
Ministry of National Guard – Health Affairs

**Sub-investigators: Dr. Hanan Elkafafi Hassan Elkafafi and Ms. Raya Zaki Almadani**

After reviewing your submitted research proposal/protocol and related documents, the **IRB has APPROVED** the submission. The approval includes the following related documents:

| Document/Title                | Version | Date        |
|-------------------------------|---------|-------------|
| Research Proposal             | 01      | 18 May 2020 |
| Informed Consent              | 01      | 18 May 2020 |
| Data Collection/Questionnaire | 01      | 18 May 2020 |

The approval of the research study is valid for **one year** from the above approval to expiration date.

**Terms of Approval:**

- **Annual Reports:** An Annual report must be submitted for approval to avoid termination/suspension of your research.
- **Financial report:** If your study is funded project, details financial report should be submitted with the scientific report.
- **Final Report:** After completion of the study, a final report must be forwarded to the IRB.
- **Retention of original data:** The PI is responsible for the storage and retention of original data pertaining to the project for a minimum of five years.
- **Reporting of adverse events or unanticipated problems:** The PI is responsible to report any serious or unexpected adverse events or unanticipated problems, which could involve any risk to participants or others, or any event on incidents that may have impact on the research or participants.
- **Biological samples:** No biological samples to be shipped out of the Kingdom of Saudi Arabia without prior IRB approval.
- **Participant incentives:** No financial compensation or gifts to be given to participants without prior IRB approval.
- **Storage of biological samples:** All biological samples collected for the purpose of this research must be stored in the KAIMRC related repository.
- You will need to resubmit the proposal to the IRB for review and re-approval before implementing any changes to the approved proposal.
- It is possible that the IRB may decide that the proposed new changes may exclude the proposal from being accepted for exempt review.
- It is your responsibility to safely store the data collected.

19 MAY 2020

**Prof. Abdullah Al Sayyari**

Chairman, Institutional Review Board (IRB)  
Ministry of National Guard - Health Affairs

AS/rla
